# Supplementary material for: Cesium manganese halide perovskite-analogue nanocrystals with highly efficient energy conversion for flexible multifunctional fibers
Source: Royal Society of Chemistry journal article supplement (doi:10.1039/d2qi02514k), 2023-01-01
Supplement: d2qi02514k1.pdf [file d2qi02514k1.pdf]

## Supplementary Information

### Cesium Manganese Halide Perovskite-Analogue Nanocrystals with Highly Efficient Energy Conversion for Flexible Multifunctional Fibers

Xiuqiang Duan<sup>a</sup>, Kun Nie<sup>a,b,\*</sup>, Xuyi Wang<sup>c</sup>, Chi-An Cheng<sup>d</sup>, Ranran Zhou<sup>a</sup>, Ziyao Hu<sup>a</sup>, Junbao Yan<sup>a</sup>, Lefu Mei<sup>e</sup>, Xiaoxue Ma<sup>a,\*</sup>, Songjun Yao<sup>a</sup>, Luoxin Wang<sup>a</sup>, Hua Wang<sup>a,\*</sup>

<sup>a</sup> School of Materials Science and Engineering, Hubei Key Laboratory for New Textile Materials and Applications and State Key Laboratory of New Textile Materials & Advanced Processing Technology, Wuhan Textile University, Wuhan 430200, P. R. China

<sup>b</sup> Key Laboratory of Testing and Tracing of Rare Earth Products for State Market Regulation, Jiangxi University of Science and Technology, Ganzhou 341000, P.R. China

<sup>c</sup> China Bluestar Chengrand Co., Ltd, High Tech Organic Fiber Key Laboratory of Sichuan Province, Chengdu 610042, China

<sup>d</sup> School of Pharmacy, Taiwan University, Taipei 100025 Taiwan, China

<sup>e</sup> Beijing Key Laboratory of Materials Utilization of Nonmetallic Minerals and Solid Wastes, National Laboratory of Mineral Materials, School of Materials Science and Technology, China University of Geosciences (Beijing), Beijing 100083, P. R. China

\* Corresponding authors. E-mail addresses: knie@wtu.edu.cn (K. Nie); maxiaoxue2010@126.com (X. X. Ma); huawangabc@163.com (H. Wang)

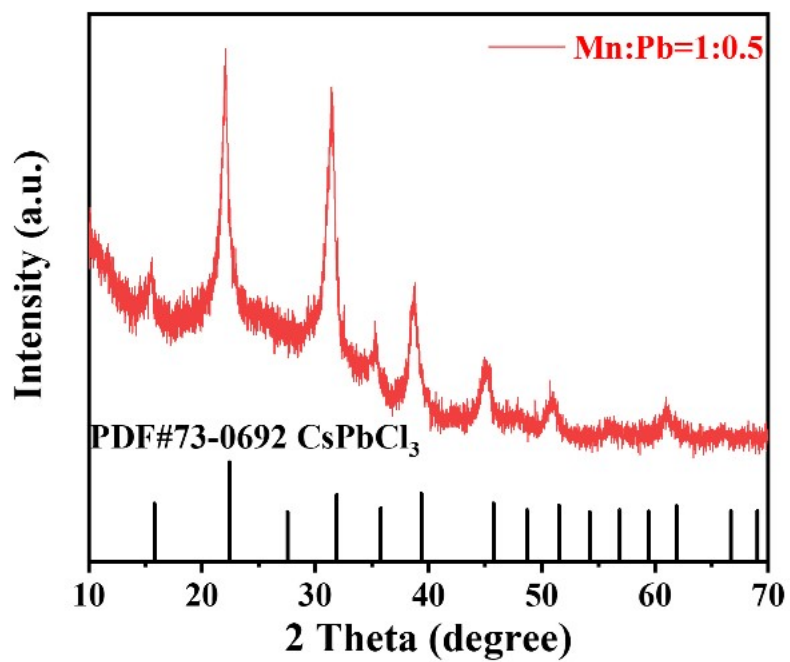

Fig. S1 XRD pattern of Pb<sup>2+</sup>-incorporated Mn-based PA NCs with Mn:Pb=1:0.5.

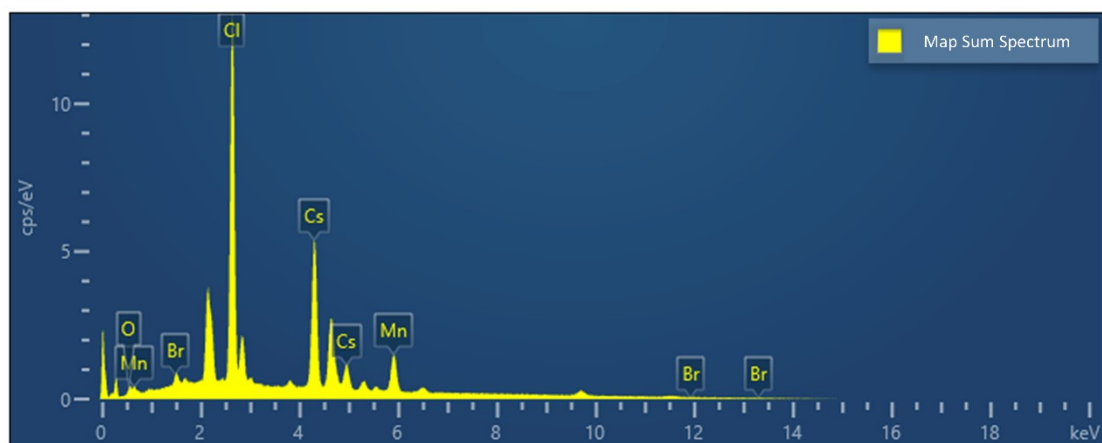

Fig. S2. EDS spectrum recording from Cs<sub>2</sub>Mn(Cl/Br)<sub>4</sub>·2H<sub>2</sub>O PA NCs, showing the existence of Cs, Mn, Cl, Br and O elemental signals.

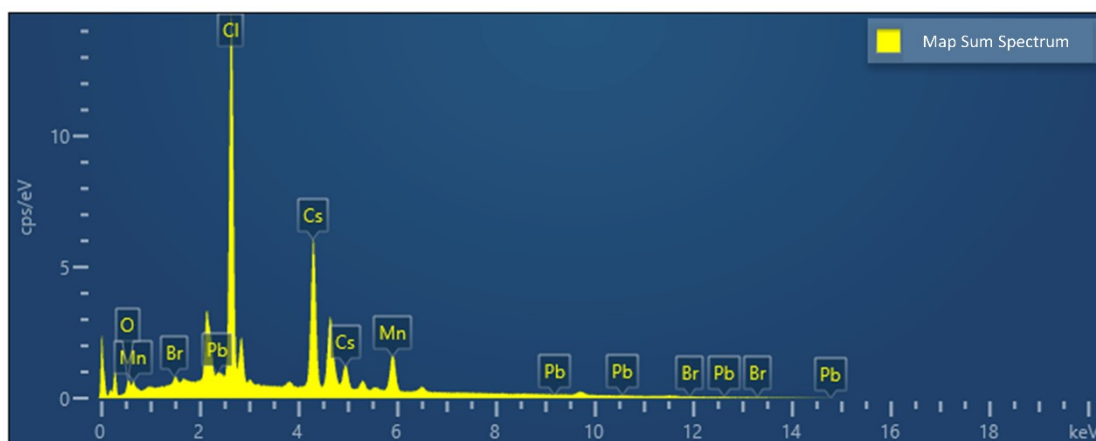

**Fig. S3.** EDS spectrum recording from  $\text{Pb}^{2+}$  doped  $\text{Cs}_2\text{Mn}(\text{Cl}/\text{Br})_4 \cdot 2\text{H}_2\text{O}$  PA NCs ( $\text{Mn}:\text{Pb} = 1:0.05$ ), showing the existence of Cs, Pb, Mn, Cl, Br and O elemental signals.

**Table. S1** Ratio of elements in the products ( $\text{Mn}:\text{Pb} = 1:0.05$ ) and Pristine detected by EDS.

| Sample   | EDS (atomic ratio %) |       |      |       |      |      |
|----------|----------------------|-------|------|-------|------|------|
|          | Cs                   | Mn    | Pb   | Cl    | Br   | O    |
| (Mn:Pb)  |                      |       |      |       |      |      |
| Pristine | 30.82                | 15.30 | /    | 51.23 | 1.35 | 1.30 |
| 1:0.05   | 30.14                | 14.73 | 0.24 | 50.43 | 0.84 | 3.62 |

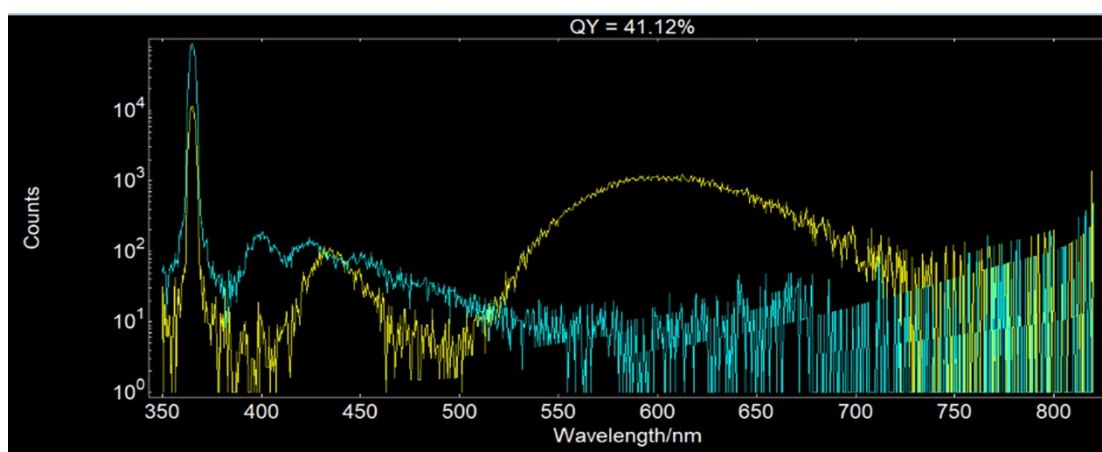

**Fig. S4.** Absolute PLQY of  $\text{Pb}^{2+}$  doped  $\text{Cs}_2\text{Mn}(\text{Cl}/\text{Br})_4 \cdot 2\text{H}_2\text{O}$  PA NCs ( $\text{Mn}:\text{Pb} = 1:0.40$ ) at 598 nm.

**Table. S2** Summary of Fitting Parameters for TRPL Profiles of PA NCs with Different Mn–Pb Ratios Using a Double-exponential Function for Mn<sup>2+</sup> emission.

| Sample (Mn:Pb) | $\tau_1$ (ns) | $\tau_2$ (ns) | $\tau_{ave}$ (ns) | PLQY of Mn <sup>2+</sup> |
|----------------|---------------|---------------|-------------------|--------------------------|
| 1:0.05         | 0.36          | 4.82          | 3.26              | 2.84%                    |

  

| Sample (Mn:Pb) | $\tau_1$ ( $\mu$ s) | $\tau_2$ ( $\mu$ s) | $\tau_{ave}$ ( $\mu$ s) | PLQY of Mn <sup>2+</sup> |
|----------------|---------------------|---------------------|-------------------------|--------------------------|
| 1:0.10         | 363.32              | 1617.25             | 1491.24                 | 7.31%                    |
| 1:0.15         | 488.49              | 1473.99             | 1367.47                 | 26.14%                   |
| 1:0.20         | 713.39              | 1465.63             | 1327.80                 | 33.53%                   |
| 1:0.40         | 717.27              | 1291.52             | 1081.71                 | 41.12%                   |

**Table. S3** Manganese-based perovskites.

| formula                                                                                   | method                            | temperature (°C) | peak wavalength (nm) | PLQY (%) | refs      |
|-------------------------------------------------------------------------------------------|-----------------------------------|------------------|----------------------|----------|-----------|
| CsMnCl <sub>3</sub>                                                                       | hot-injection                     | 140              | 660                  | 0.7      | 1         |
| CsMnBr <sub>3</sub>                                                                       | hot-injection                     | 170              | 643                  | 54       | 2         |
| Cs <sub>3</sub> MnBr <sub>5</sub>                                                         | hot-injection                     | 200              | 520                  | 48       | 3         |
| CsMn <sub>1-x</sub> Pb <sub>x</sub> (Cl/Br) <sub>3</sub> ·2H <sub>2</sub> O (x < 50%)     | supersaturation recrystallization | room temperature | ≈600                 | 41.8     | 4         |
| Cs <sub>2</sub> Mn <sub>1-x</sub> Pb <sub>x</sub> (Cl/Br) <sub>4</sub> ·2H <sub>2</sub> O | hot-injection                     | 150              | ≈598                 | 41.12    | this work |

## References

1. L. Guan, S. Shi, X. Niu, S. Guo, J. Zhao, T. Ji, H. Dong, F. Jia, J. Xiao, L. Sun, C. Yan, All-inorganic manganese-based CsMnCl<sub>3</sub> nanocrystals for X-Ray imaging, *Adv. Sci.*, 2022, **9**, e2201354.
2. J. Almutlaq, W. J. Mir, L. Gutiérrez-Arzaluz, J. Yin, S. Vasylevskyi, P. Maity, J. Liu, R. Naphade, O. F. Mohammed, and O. M. Bakr, CsMnBr<sub>3</sub>: Lead-free nanocrystals with high Photoluminescence Quantum Yield and Picosecond Radiative Lifetime, *ACS Materials Lett.*, 2021, **3**, 290–297.
3. Q. Kong, B. Yang, J. Chen, R. Zhang, S. Liu, D. Zheng, H. Zhang, Q. Liu, Y. Wang, K. Han, Phase engineering of cesium manganese bromides nanocrystals with color-tunable emission, *Angew. Chem.*, 2021, **133**, 19805-19811.
4. Q. Meng, L. Zhou, Q. Pang, X. He, T. Wei, J. Zhang, Enhanced photoluminescence of all-inorganic manganese halide perovskite-analogue nanocrystals by lead ion incorporation, *J. Phys. Chem. Lett.*, 2021, **12**, 10204-10211.
